# Supplementary material
Source: publisher figshare collection journal article supplement (https://sage.figshare.com/ndownloader/files/17785391)
Supplement: Supplementary file 1 [file 17785391]

**Table 1 Supplement. Summary of Motion Picture Incentive Programs Tax Incentives among High-Expenditure States.**

| State         | Program Name                                                                                      | Details                                                                                                                                           |
|---------------|---------------------------------------------------------------------------------------------------|---------------------------------------------------------------------------------------------------------------------------------------------------|
| New York      | Film Production Tax Credit                                                                        | Refundable 30 percent tax credit against qualified in-state spending; additional 10 percent tax credit against labor expenses in certain counties |
| Louisiana     | Motion Picture Production Tax Credit                                                              | Partially refundable 25-40 percent tax credit against qualified in-state spending                                                                 |
| Georgia       | Film, Television, and Digital Entertainment Tax Credit                                            | Transferrable 20-30 percent tax credit against qualified in-state spending                                                                        |
| Connecticut   | Digital Media & Motion Picture Tax Credit and the Digital Animation Production Company Tax Credit | Transferrable 10-30 percent tax credit against qualified in-state spending                                                                        |
| Massachusetts | Film Tax Credit                                                                                   | Either refundable or transferrable 25% tax credit against qualified spending, both in-state and out-of-state                                      |

---

*Sources:* New York: Empire State Development; Louisiana: Louisiana Entertainment/Economic Development; Georgia: Department of Economic Development; Connecticut: Department of Economic and Community Development; Massachusetts: Massachusetts Film Office; see also National Conference of State Legislatures, “State Film Production Incentives & Programs,” issued in January 2018.

**Table 2 Supplement. Variable Sources and Descriptive Statistics.**

| Variable                                                    | Area          | Source                                                                                                                                                   | Mean  | SD     |
|-------------------------------------------------------------|---------------|----------------------------------------------------------------------------------------------------------------------------------------------------------|-------|--------|
| Annual Change in Motion Picture Industry Employment         | New York      | QCEW                                                                                                                                                     | 3.16  | 7.55   |
|                                                             | Louisiana     | QCEW                                                                                                                                                     | 17.26 | 44.04  |
|                                                             | Georgia       | QCEW                                                                                                                                                     | 13.60 | 25.93  |
|                                                             | Connecticut   | QCEW                                                                                                                                                     | 12.31 | 37.08  |
|                                                             | Massachusetts | QCEW                                                                                                                                                     | 4.87  | 21.81  |
|                                                             | US Overall    | QCEW                                                                                                                                                     | 3.30  | 7.41   |
| Annual Change in Motion Picture Industry Wages per Employee | New York      | QCEW                                                                                                                                                     | 1.18  | 6.60   |
|                                                             | Louisiana     | QCEW                                                                                                                                                     | 5.09  | 35.83  |
|                                                             | Georgia       | QCEW                                                                                                                                                     | 2.08  | 15.93  |
|                                                             | Connecticut   | QCEW                                                                                                                                                     | 3.58  | 27.80  |
|                                                             | Massachusetts | QCEW                                                                                                                                                     | 0.01  | 8.08   |
| Annual Change in MPI Tax Expenditures                       | New York      | Annual Report on New York State Tax Expenditures, Department of Taxation and Finance                                                                     | 28.85 | 60.78  |
|                                                             | Louisiana     | Office of Entertainment Industry Development Louisiana Department of Economic Development                                                                | 10.14 | 29.56  |
|                                                             | Georgia       | Tax Expenditure Reports, Department of Audits and Accounts                                                                                               | 25.02 | 40.56  |
|                                                             | Connecticut   | Annual Reports, Department of Community and Economic Development                                                                                         | 21.18 | 62.23  |
|                                                             | Massachusetts | Tax Expenditure Budget, Executive Office for Administration and Finance                                                                                  | 37.10 | 112.66 |
|                                                             | Other States  | Various                                                                                                                                                  | 60.20 | 126.94 |
|                                                             | Canada        | Multiple reports from Canada Revenue Agency; Ontario Ministry of Finance and Ontario Media Development Corporation; British Columbia Ministry of Finance | 12.99 | 48.94  |
| Annual Change in Private Sector Employment                  | New York      | QCEW                                                                                                                                                     | 0.84  | 1.60   |
|                                                             | Louisiana     | QCEW                                                                                                                                                     | 0.97  | 1.73   |
|                                                             | Georgia       | QCEW                                                                                                                                                     | 1.64  | 2.80   |
|                                                             | Connecticut   | QCEW                                                                                                                                                     | 0.34  | 1.64   |
|                                                             | Massachusetts | QCEW                                                                                                                                                     | 1.09  | 1.73   |

*Notes:* QCEW denotes Quarterly Census of Economics and Wages. All variables are reported in annual percentage-point changes in constant dollar equivalents, adjusted using the Consumer Price Index. Canadian tax expenditures were adjusted first to then-current US dollar equivalents. All national descriptive statistics are calculated across the period of available data (1991 – 2017); all state descriptive statistics are calculated across the state's pre- and post-intervention periods.

**Table 3 Supplement. Summary of Effect of Own-State Motion Picture Tax Expenditure on Alternative Outcome Variables.**

| State         | Motion Picture Employment as Share of State's Private Sector | Change in Motion Picture Employment as a Share of State's Private Sector | State's Share of National Motion Picture Employment | Change in State's Share of National Motion Picture Employment |
|---------------|--------------------------------------------------------------|--------------------------------------------------------------------------|-----------------------------------------------------|---------------------------------------------------------------|
| New York      | -                                                            | -                                                                        | -                                                   | -                                                             |
| Louisiana     | -                                                            | -                                                                        | -                                                   | -                                                             |
| Georgia       | -                                                            | $b = 0.505^{**}$                                                         | -                                                   | $b = 0.505^{**}$                                              |
| Connecticut   | -                                                            | -                                                                        | -                                                   | -                                                             |
| Massachusetts | -                                                            | $b = 0.145^{***}$                                                        | -                                                   | $b = 0.139^{***}$                                             |

*Notes:* (-) indicates coefficient was not statistically-significant. Where present, cell entries are Prais–Winsten regression coefficients. \*\*\*  $p < 0.01$ ; \*\*  $p < 0.05$ ; \*  $p < 0.10$ .

**Table 4 Supplement. Effect of Motion Picture Incentive Programs and Other Factors on the Annual Change in Motion Picture Industry Employment, Robustness Check using Revised Pre- and Post-Intervention Phases.**

|                                                   | New York |     | Louisiana |     | Georgia  |     | Connecticut |     | Massachusetts |     |
|---------------------------------------------------|----------|-----|-----------|-----|----------|-----|-------------|-----|---------------|-----|
| Internal Factors                                  |          |     |           |     |          |     |             |     |               |     |
| Change in Own-State Tax Expenditures              | -0.036   |     | 1.553     | *** | 0.433    | **  | 0.326       | **  | 0.108         | **  |
|                                                   | (0.026)  |     | (0.431)   |     | (0.189)  |     | (0.141)     |     | (0.038)       |     |
| Change in Own-State Motion Picture Industry Wages | -0.792   | *** | -0.910    | *** | -0.412   |     | -0.587      |     | 1.521         | **  |
|                                                   | (0.235)  |     | (0.248)   |     | (0.274)  |     | (0.524)     |     | (0.633)       |     |
| Competitive Factors                               |          |     |           |     |          |     |             |     |               |     |
| Change in MPI Tax Expenditures, New York          | n/a      |     | -0.471    | **  | -0.001   |     | 0.274       | *   | 0.230         | *** |
|                                                   |          |     | (0.165)   |     | (0.102)  |     | (0.121)     |     | (0.047)       |     |
| Change in MPI Tax Expenditures, Louisiana         | -0.096   |     | n/a       |     | 0.378    |     | -0.725      |     | -0.245        |     |
|                                                   | (0.086)  |     |           |     | (0.398)  |     | (0.518)     |     | (0.202)       |     |
| Change in MPI Tax Expenditures, Georgia           | -0.106   |     | 0.033     |     | n/a      |     | 0.516       |     | 0.211         |     |
|                                                   | (0.058)  |     | (0.251)   |     |          |     | (0.286)     |     | (0.136)       |     |
| Change in MPI Tax Expenditures, Connecticut       | -0.038   |     | 0.155     |     | -0.105   |     | n/a         |     | -0.195        | *** |
|                                                   | (0.031)  |     | (0.170)   |     | (0.117)  |     |             |     | (0.052)       |     |
| Change in MPI Tax Expenditures, Massachusetts     | -0.001   |     | 0.146     |     | 0.117    |     | -0.162      |     | n/a           |     |
|                                                   | (0.018)  |     | (0.087)   |     | (0.069)  |     | (0.097)     |     |               |     |
| Change in MPI Tax Expenditures, Other US States   | -0.003   |     | 0.242     | **  | 0.004    |     | 0.030       |     | 0.005         |     |
|                                                   | (0.011)  |     | (0.070)   |     | (0.042)  |     | (0.063)     |     | (0.020)       |     |
| Change in MPI Tax Expenditures, Canada            | 0.028    |     | -0.273    |     | 0.119    |     | 0.079       |     | -0.083        |     |
|                                                   | (0.037)  |     | (0.185)   |     | (0.124)  |     | (0.152)     |     | (0.060)       |     |
| Controls                                          |          |     |           |     |          |     |             |     |               |     |
| Change in US Motion Picture Industry Employment   | 0.499    | *   | -1.876    | *   | 1.446    |     | 1.652       |     | -0.711        |     |
|                                                   | (0.248)  |     | (0.974)   |     | (0.912)  |     | (1.737)     |     | (2.913)       |     |
| Change in Own-State Private Sector Employment     | 1.854    | **  | -9.021    |     | -3.784   |     | -2.581      |     | 0.659         |     |
|                                                   | (0.822)  |     | (5.252)   |     | (3.523)  |     | (8.000)     |     | (2.913)       |     |
| Employment Trends                                 |          |     |           |     |          |     |             |     |               |     |
| Pre-MPI Program Trend ( $\beta_1$ )               | -0.549   |     | -9.415    | *** | -4.836   |     | -3.129      |     | -2.503        |     |
|                                                   | (0.460)  |     | (2.867)   |     | (4.055)  |     | (7.459)     |     | (2.163)       |     |
| Initial MPI Program Impact ( $\beta_2$ )          | 21.470   | **  | -20.839   |     | -32.237  |     | 80.561      |     | 28.904        | *   |
|                                                   | (7.122)  |     | (36.740)  |     | (19.301) |     | (50.582)    |     | (13.056)      |     |
| Subsequent Program Impact ( $\beta_3$ )           | -1.28    |     | 16.384    | *** | 16.334   |     | -9.231      |     | -0.168        |     |
|                                                   | (1.209)  |     | (2.867)   |     | (9.471)  |     | (11.762)    |     | (3.993)       |     |
| Model Information                                 |          |     |           |     |          |     |             |     |               |     |
| Number of Observations                            | 26       |     | 27        |     | 24       |     | 22          |     | 24            |     |
| F-score                                           | 6.29     | *** | 3.38      | **  | 7.25     | *** | 6.72        | *** | 17.17         | *** |
| R-squared                                         | 0.870    |     | 0.772     |     | 0.904    |     | 0.911       |     | 0.957         |     |

Notes: Cell entries are Prais–Winsten regression coefficients; standard errors appear in parenthesis. \*\*\*  $p < 0.001$ ; \*\*  $p < 0.01$ ; \*  $p < 0.05$ .

**Table 5 Supplement. Effect of Motion Picture Incentive Programs and Other Factors on the Annual Change in Motion Picture Industry Employment, Robustness Check without Control for Tax Expenditures.**

|                                                   | New York |     | Louisiana |     | Georgia  |    | Connecticut |     | Massachusetts |     |
|---------------------------------------------------|----------|-----|-----------|-----|----------|----|-------------|-----|---------------|-----|
| Internal Factors                                  |          |     |           |     |          |    |             |     |               |     |
| Change in Own-State Motion Picture Industry Wages | -0.561   | *** | -0.910    | *** | -0.307   |    | -0.680      | **  | 0.322         |     |
|                                                   | (0.251)  |     | (0.248)   |     | (0.359)  |    | (0.255)     |     | (0.962)       |     |
| Competitive Factors                               |          |     |           |     |          |    |             |     |               |     |
| Change in MPI Tax Expenditures, New York          | n/a      |     | -0.232    |     | 0.124    |    | 0.241       | **  | 0.249         | **  |
|                                                   |          |     | (0.166)   |     | (0.123)  |    | (0.074)     |     | (0.089)       |     |
| Change in MPI Tax Expenditures, Louisiana         | -0.178   |     | n/a       |     | 0.204    |    | -0.644      |     | -0.932        | *** |
|                                                   | (0.158)  |     |           |     | (0.375)  |    | (0.390)     |     | (0.243)       |     |
| Change in MPI Tax Expenditures, Georgia           | -0.081   |     | 0.394     |     | n/a      |    | 0.572       | *** | 0.121         |     |
|                                                   | (0.063)  |     | (0.315)   |     |          |    | (0.167)     |     | (0.214)       |     |
| Change in MPI Tax Expenditures, Connecticut       | -0.034   |     | 0.046     |     | -0.079   |    | n/a         |     | -0.177        |     |
|                                                   | (0.033)  |     | (0.212)   |     | (0.128)  |    |             |     | (0.091)       |     |
| Change in MPI Tax Expenditures, Massachusetts     | -0.005   |     | -0.077    |     | 0.087    |    | -0.183      | **  | n/a           |     |
|                                                   | (0.026)  |     | (0.072)   |     | (0.064)  |    | (0.071)     |     |               |     |
| Change in MPI Tax Expenditures, Other US States   | -0.019   |     | 0.122     |     | 0.041    |    | 0.043       |     | 0.023         |     |
|                                                   | (0.011)  |     | (0.075)   |     | (0.059)  |    | (0.043)     |     | (0.040)       |     |
| Change in MPI Tax Expenditures, Canada            | 0.039    |     | -0.215    |     | 0.045    |    | 0.005       |     | -0.175        |     |
|                                                   | (0.043)  |     | (0.218)   |     | (0.154)  |    | (0.112)     |     | (0.109)       |     |
| Controls                                          |          |     |           |     |          |    |             |     |               |     |
| Change in US Motion Picture Industry Employment   | 0.456    |     | -2.250    | *   | 1.597    |    | 0.475       |     | -0.217        |     |
|                                                   | (0.283)  |     | (1.318)   |     | (1.115)  |    | (1.240)     |     | (0.923)       |     |
| Change in Own-State Private Sector Employment     | 1.756    | *   | 2.333     |     | -0.286   |    | -1.389      |     | 7.524         |     |
|                                                   | (0.921)  |     | (5.754)   |     | (3.559)  |    | (5.320)     |     | (4.598)       |     |
| Employment Trends                                 |          |     |           |     |          |    |             |     |               |     |
| Pre-MPI Program Trend ( $\beta_1$ )               | -0.465   |     | -9.136    | **  | -0.924   |    | -3.745      |     | 2.074         |     |
|                                                   | (0.551)  |     | (3.325)   |     | (4.540)  |    | (4.751)     |     | (3.438)       |     |
| Initial MPI Program Impact ( $\beta_2$ )          | 20.686   |     | 67.546    | *   | -30.510  |    | 101.127     | *** | 42.887        | *   |
|                                                   | (12.176) |     | (35.169)  |     | (28.947) |    | (22.588)    |     | (19.389)      |     |
| Subsequent Program Impact ( $\beta_3$ )           | -1.359   |     | 6.538     |     | 8.201    |    | -8.817      |     | -10.177       | *   |
|                                                   | (1.670)  |     | (4.298)   |     | (8.905)  |    | (8.500)     |     | (5.289)       |     |
| Model Information                                 |          |     |           |     |          |    |             |     |               |     |
| Number of Observations                            | 26       |     | 27        |     | 24       |    | 22          |     | 24            |     |
| F-score                                           | 3.96     | *** | 2.02      | *   | 3.37     | ** | 12.31       | *** | 4.28          | *   |
| R-squared                                         | 0.785    |     | 0.634     |     | 0.786    |    | 0.943       |     | 0.824         |     |

Notes: Cell entries are Prais–Winsten regression coefficients; standard errors appear in parenthesis. \*\*\*  $p < 0.001$ ; \*\*  $p < 0.01$ ; \*  $p < 0.05$ .
